# Supplementary material for: Timing of Chromosome DNA Integration throughout the Yeast Cell Cycle
Source: MDPI journal article supplement (doi:10.3390/biom13040614), 2023-03-29
Supplement: s1 [file s1]

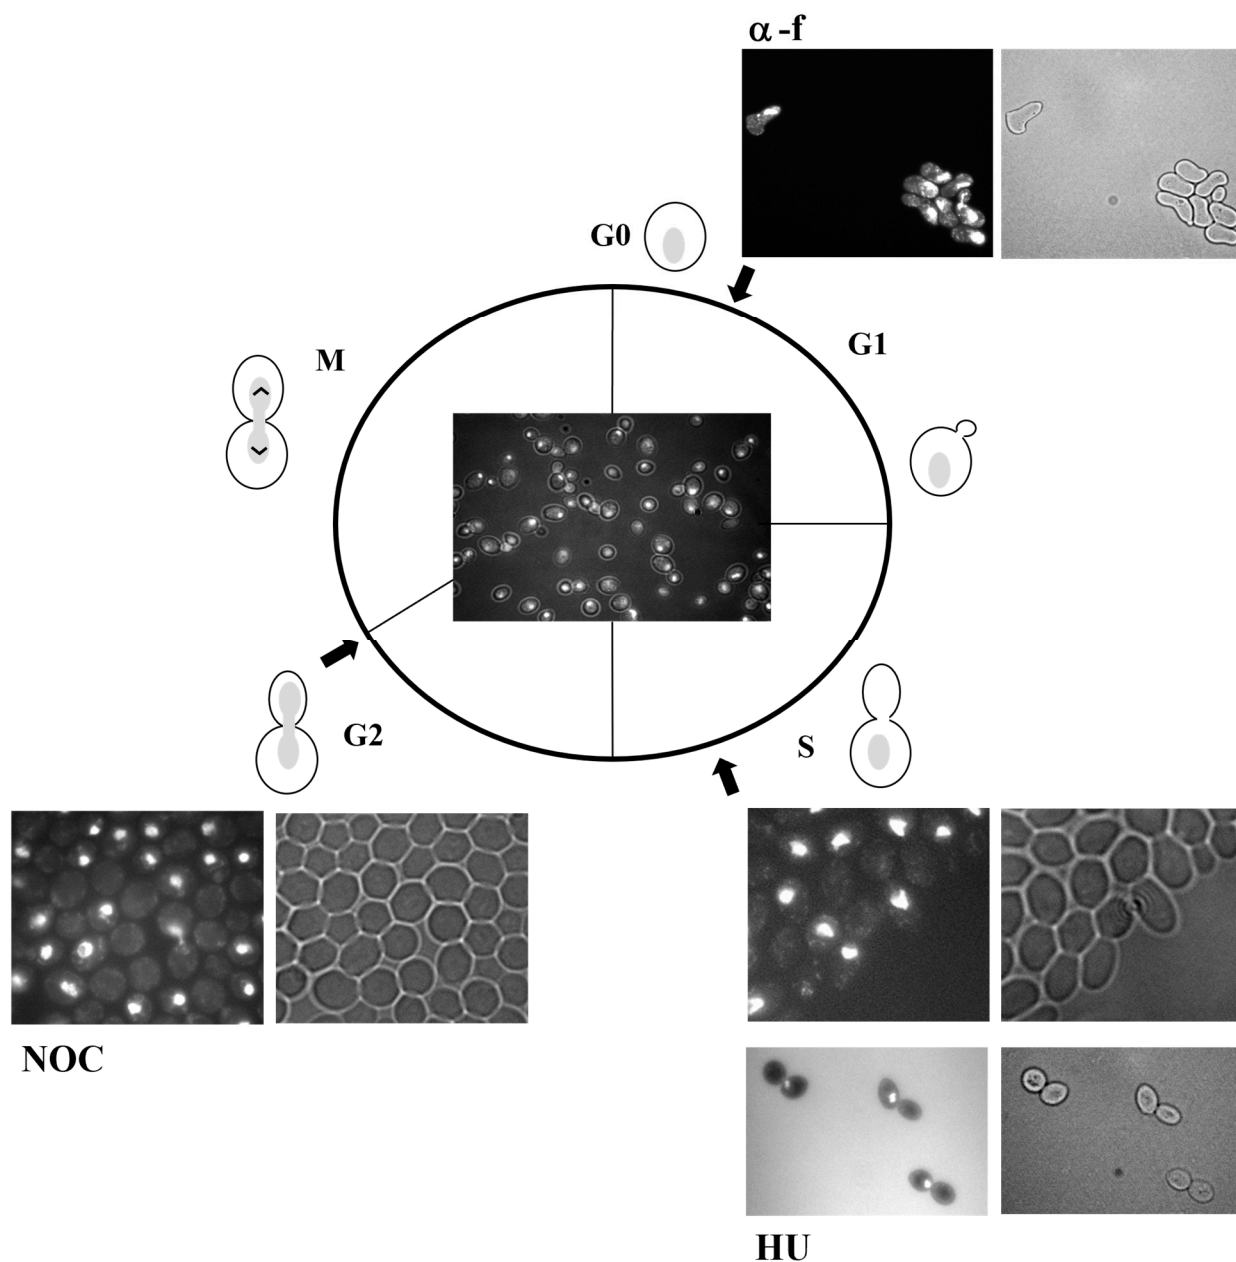

**Figure S1.** Arrest points of the *S. cerevisiae* mitotic cell cycle. Main cell cycle phases of the budding yeast on which the black arrows indicate the point within G1, S and G2/M where yeast strain San1 cells were blocked before transformation either with the BIT or SSI cassettes. α-f (a-factor), HU (hydroxyurea) and NOC (nocodazole) are the three drugs used to synchronize the *S. cerevisiae* cells. Fluorescence microscope images show cell and nuclear morphology in a San1 asynchronous cell population (center) and, clockwise from top, G1-arrested San1VTDMAT cells, late S-phase and G2/M San1 blocked cells. DAPI was used to visualize the nuclei. For HU specific single cells were also shown.

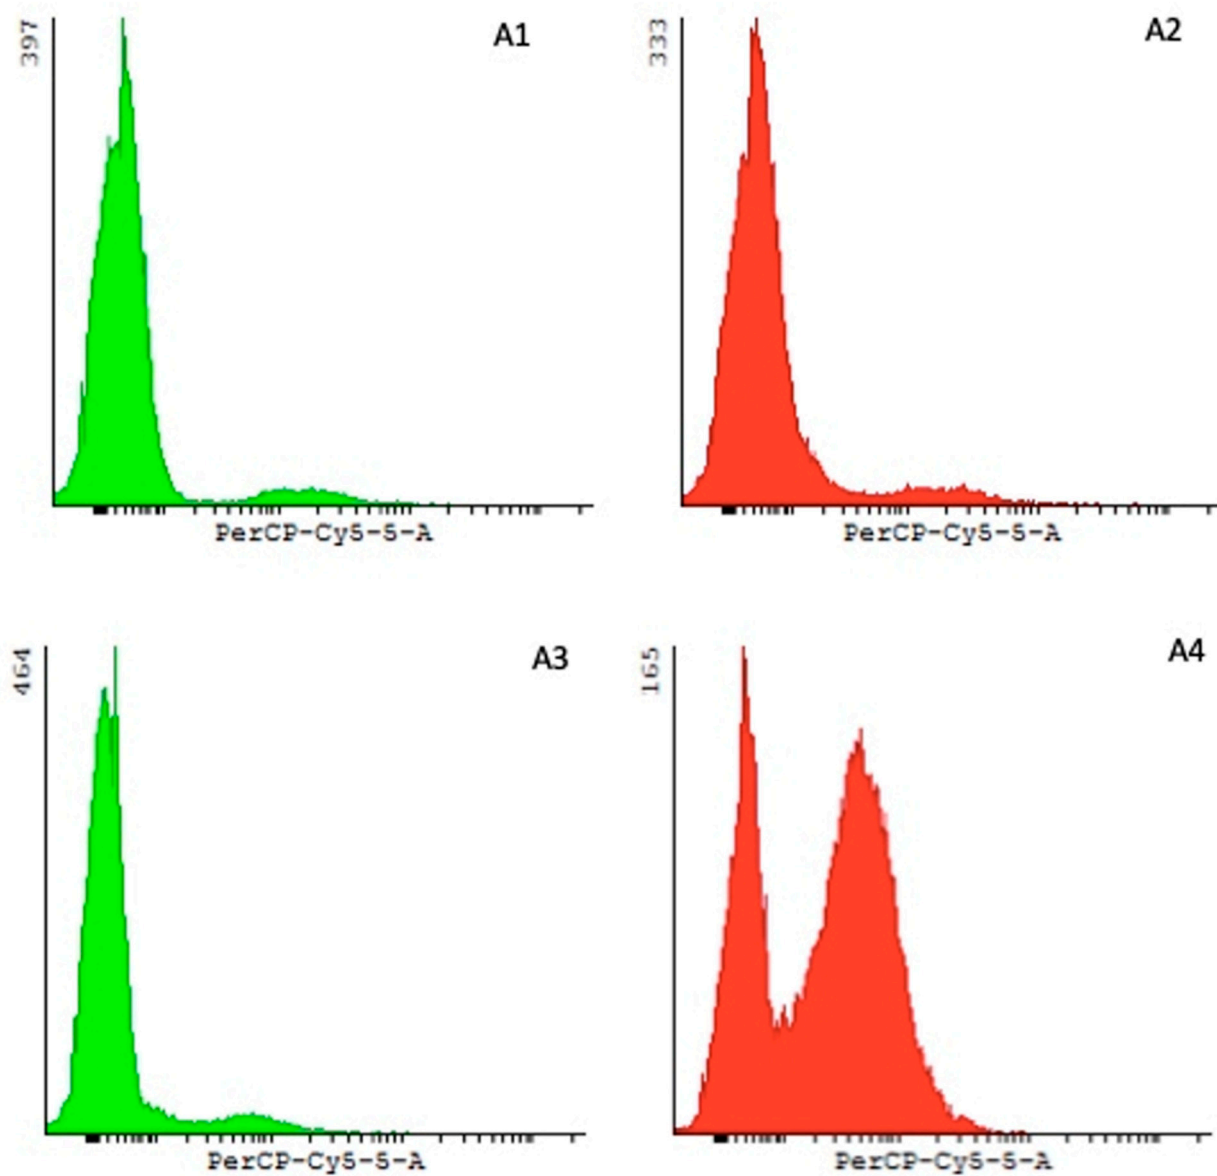

**Figure S2.** Flow Cytometry of translocant Susu5 compared to San1. Panel (A1): PI stained San1 at 7 days of ageing. Panel (A2): DHE stained San1 at 7 days of ageing. Panel (A3): PI stained Susu5 at 7 days of ageing. Panel (A4): DHE stained Susu5 at 7 days of ageing. All the experiments were performed three times with similar results.

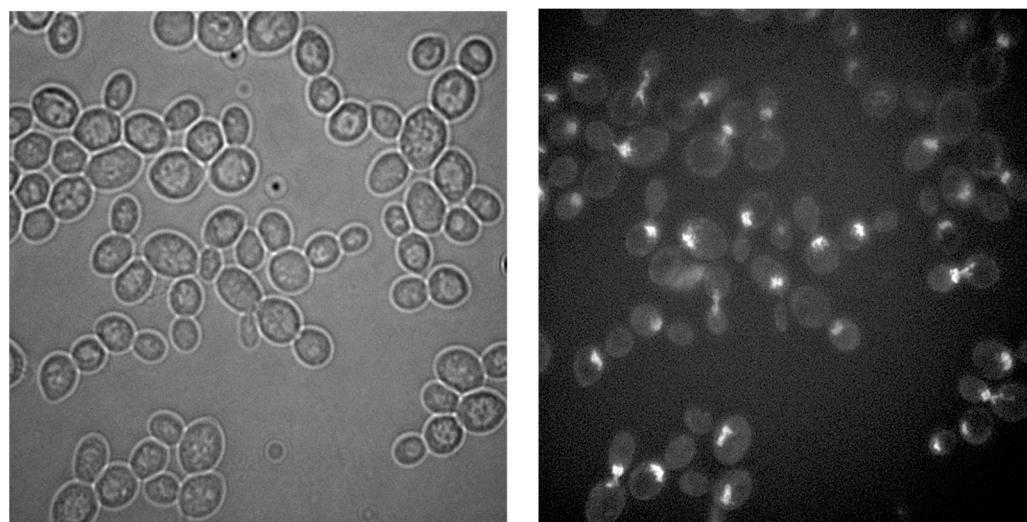

**Figure S3.** The double deletion of *POL32* in *San1* generates a mutant showing an abnormal phenotype with an evident G2/M arrest before (left) and after (right) DAPI staining.

**Table S1.** The following primers were used for the construction of the BIT and SSI cassettes (lower-case letters indicate the homology with kanamycin resistance gene *Kan<sup>R</sup>*) and for verification of the correct integration of the cassette; the coordinates are indicated in parenthesis and the exact location of the primers is shown in Figures 2 and 3.

| Primers used in this work                  |                                                                                                |
|--------------------------------------------|------------------------------------------------------------------------------------------------|
| <i>Translocation AD and SSI (XV-VIII):</i> |                                                                                                |
| <i>XVFW</i> (ChromXV, 160604-160667)       | CTTCTTCCTTGTTTCTTTTCTGCACAATATTTCAAGCT<br>TACCAAGCATACAATCAACTATCgtcgacggatccccgggtaa          |
| <i>VIIIRev</i> (ChromVIII, 74204-74268)    | TACCCAGCGCCTTGAGGTAGCGGAGGTTTAAATTCTCC<br>CATACTATAACAATGACAAATTTATGTccgcgcgttggccgat<br>at    |
| <i>XVRev</i> (ChromXV, 159373-159432)      | GGTCAATAAGAGCGACCTCATGCTATACCTGAGAAAC<br>AACCTGACCTACAGGAAAGAGTccgcgcgttggccgattcat            |
| <i>VIIIFW</i> (ChromVIII, 74204-74271)     | ATAACATAAATTTGTTCATTGTTATAGTATGGGAGAATT<br>AAACCTCCGCTACCTCAAGGCGCTGGGTAgtcgacggatcc<br>gggtaa |
| <i>VIIIRevII</i> (ChromVIII, 72010-72076)  | AGTGGATAGAATATTATATTTTGAAAGCTAAATTATTT<br>GTCAACTTGTCGAAATGTGATGATTGTccgcgcgttggccga<br>cat    |
| <i>AdhF1</i> (ChromXV, 159807- 159827)     | TTAGCTCTAACGTATCTGGTA                                                                          |
| <i>AdhR1</i> (ChromXV, 160780-160799)      | AATGAGCAACGGTATACGGC                                                                           |
| <i>AdhF2</i> (ChromXV, 159139-139158)      | GTCTTGAAGCTCAGGTAAGG                                                                           |
| <i>AdhR2</i> (ChromXV, 159631-159651)      | AGTCTCCAATCAAGGTTGTCG                                                                          |
| <i>DurF1</i> (ChromVIII, 74335-74354)      | AGCAGTAGTATAGCCGTAGC                                                                           |
| <i>DurR1</i> (ChromVIII, 73945-73964)      | AATTTGGAAGCATGCGCCAG                                                                           |
| <i>DurF2</i> (ChromVIII, 72000-72020)      | GAGGTTGATGAGTGGATAGAA                                                                          |
| <i>DurR2</i> (ChromVIII, 72156-72176)      | GGGATCTATCTGGTCAAACCTT                                                                         |
| <i>Translocation SSU and SSI (XVI-IX):</i> |                                                                                                |

|                                                                                                                                                           |                                                                                             |
|-----------------------------------------------------------------------------------------------------------------------------------------------------------|---------------------------------------------------------------------------------------------|
| <b>XVIFw</b> (ChromXVI, 375433-375497)                                                                                                                    | TCTCAGTATATTTTGCTGCTTTCCTTCATATGTATATAT<br>TCTATTTACATATTAGTTTACAGAAgtcgacggatccccggggtta   |
| <b>IXRev</b> (ChromIX, 36685-36749)                                                                                                                       | CTTTGCTGGGGGAGCGAGAACTACGCTAGGACAACA<br>CTCCCATACGGTAAATGTCTTAGTATGTccgcgcttgccga<br>cat    |
| <b>XVIRev</b> (ChromXVI, 376444-376508)                                                                                                                   | ACAACGTCACCTAGAGAATAAATGTTTGAACATTGG<br>GTTCTGATATTCATCAGCAATTATTTGccgcgcttgccgatt<br>t     |
| <b>IXFW</b> (ChromIX, 35801-35865)                                                                                                                        | TTTCTAGGTGCTAGCCAGGCTGTGAGAACGTAAAATT<br>GCCTATGTTCAACATTCTCTGCTTTTCgtcgacggatccccggg<br>aa |
| <b>SsuF1:</b> (ChromXVI, 375348-375367)                                                                                                                   | CGGAGCTTTCATTGGAAT                                                                          |
| <b>SsuR1:</b> (ChromXVI, 375570-375589)                                                                                                                   | CGATGACGAGGTAATCGTAA                                                                        |
| <b>SucF1:</b> (ChromIX, 36537-36556)                                                                                                                      | ATAGGGGCTTAGCATCCACA                                                                        |
| <b>SucR1:</b> (ChromIX, 36973-36992)                                                                                                                      | CCTGGACGTGGGGTCGATTA                                                                        |
| <b>SsuF2:</b> (ChromXVI, 376348-376367)                                                                                                                   | ATCGATGACGTTGACGAATT                                                                        |
| <b>SsuR2:</b> (ChromXVI, 376816-376835)                                                                                                                   | GAGGAATCACCAACAATGTG                                                                        |
| <b>SucF2:</b> (ChromIX, 35778-35796)                                                                                                                      | TACTAACATGGCAGCATGC                                                                         |
| <b>SucR2:</b> (ChromIX, 36281-36300)                                                                                                                      | CGACGGCATTAGCAAAGCTT                                                                        |
| <i>Primers on kanamycin resistance gene Kan<sup>R</sup>:</i>                                                                                              |                                                                                             |
| K1                                                                                                                                                        | ACAATCGATAGATTGTCGCAC                                                                       |
| K2                                                                                                                                                        | TCAGTCGTCATCATGGTGAT                                                                        |
| <i>Primers for the deletion of the MAT locus (lower-case letters indicate the homology with Kan<sup>R</sup>):</i>                                         |                                                                                             |
| <b>Fw-MATalpha</b> (III 293129-293177;199496-199544;12312384)                                                                                             | ATATATATATATATATTCTACACAGATATATACATATT<br>GTTTTTCGGGtaggcgtatcacgaggccc                     |
| <b>Rev-MATalpha</b> (III 294498-294547;200970-201019;13813859)                                                                                            | TGACAACATTCACTACTCGAAAGATAAACAACCTCCC<br>CACGACCACACTcatcgatgataagctgtcaaac                 |
| <b>F1MAT</b> (198547-198566)                                                                                                                              | ACAGCTGAACTATGTCTGCA                                                                        |
| <b>R1MAT</b> (293213-293232;199580-199599;12420-12439)                                                                                                    | CCAGAATTAGCGGACCTCTT                                                                        |
| <b>F2MAT</b> (200821-200840;13661-13680)                                                                                                                  | AAATGCAGCACGGAATATGG                                                                        |
| <b>R2MAT</b> (201245-201264)                                                                                                                              | CGTCCCGTATAGCCAATTCG                                                                        |
| <i>Primers for the construction of the mutant ΔPOL32 (=pol32Δ/pol32Δ double deletant); lower-case letters indicate the homology with Kan<sup>R</sup>:</i> |                                                                                             |
| <b>Fw1Pol32</b> (ChromX, 517470-510)                                                                                                                      | GATCAAAAGGCGTCATATTTTATCAATGAGAAGCTCTTC<br>Cataggcgtatcacgaggccc                            |
| <b>Rev1Pol32</b> (ChromX, 516466-505)                                                                                                                     | TTGCCTTCTTTTGAAAAAGCTTCCAATGTTCTTGCTTc<br>cgatgataagctgtcaaac                               |
| <b>Fw2Pol32</b> (ChromX, 517412-450)                                                                                                                      | TTTACGGATCTAATTCACCACTGAAGATCGGCCCATCCa<br>ggcgtatcacgaggccc                                |
| <b>Rev2Pol32</b> (ChromX, 516524-563)                                                                                                                     | TGACGGCGTTTCTTGCTTTTTTGAAGACGACAATGCCCTT<br>tcgatgataagctgtcaaac                            |

|                                        |                        |
|----------------------------------------|------------------------|
| <b>Pol32F1</b> (ChromX, 517647-517667) | CGGAAGTAGTAAACGCGTATG  |
| <b>Pol32F2</b> (ChromX, 516687-516707) | GCAAACAAAGCCTTCTGAAAC  |
| <b>Pol32R1</b> (ChromX, 517242-517262) | ATGGGATTGAAGGCATAGATG  |
| <b>Pol32R2</b> (ChromX, 516307-516328) | CTTCGGATGGTATATTAGGATA |

**Table S2.** Raw data of transformations.**A) BIT**

1. Distribution of the events (T:translocation; *adh1* and *dur3*: single site integration in these loci; E: ectopic integration); after transformation with the AD cassette in different phases of the cell cycle. Asynchronous populations of San1 were used as control for S, G2/M while San1VTΔMAT was used as control for G1 phase. The cells were grown  $1.4 \times 10^7$ /ml as average value. The *p*-value was determined using the Freeman-Halton extension of the Fisher probability test (see M&M). The treated cells (with HU, NOC and  $\alpha$ -f) were compared with the asynchronous populations of San1 and San1VTΔMAT (for  $\alpha$ -f only). San1VTΔMAT was also compared with San1 to understand if it is necessary and therefore statistically significant to use San1VTΔMAT as reference for the G1 phase-blocked cells. The single-side integration events were considered together within the same group of events for the *p*-value calculation (see M&M).

| Phase                   | Transformations | Transformants | T  | <i>adh1</i> | <i>dur3</i> | E  | <i>p</i> -value        |
|-------------------------|-----------------|---------------|----|-------------|-------------|----|------------------------|
| asynchronous San1       | 3               | 51            | 3  | 21          | 9           | 18 |                        |
| S phase (HU)            | 2               | 107           | 16 | 27          | 12          | 52 | $2.23 \times 10^{-2}$  |
| G2/M (NOC)              | 3               | 96            | 0  | 5           | 1           | 90 | $4.54 \times 10^{-14}$ |
| asynchronous San1VTΔMAT | 2               | 29            | 2  | 4           | 1           | 22 | $4.81 \times 10^{-4}$  |
| G1 ( $\alpha$ -f)       | 4               | 78            | 0  | 21          | 2           | 55 | $5.38 \times 10^{-2}$  |

2. Distribution of the events after transformation with the SUSU cassette in different phases of the cell cycle. Asynchronous populations of San1 were used as control for S, G2/M while San1VTΔMAT was used as control for G1 phase. Cells were grown  $1.4 \times 10^7$ /ml as average value.

| Phase                   | Transformations | Transformants | T  | <i>ssu1</i> | <i>suc2</i> | E  | <i>p</i> -value       |
|-------------------------|-----------------|---------------|----|-------------|-------------|----|-----------------------|
| asynchronous San1       | 7               | 78            | 15 | 2           | 52          | 9  |                       |
| S phase (HU)            | 13              | 87            | 8  | 1           | 70          | 8  | $1.41 \times 10^{-1}$ |
| G2/M (NOC)              | 13              | 57            | 1  | 0           | 44          | 12 | $2.84 \times 10^{-3}$ |
| asynchronous San1VTΔMAT | 2               | 24            | 3  | 1           | 5           | 15 | $3.85 \times 10^{-6}$ |
| G1 ( $\alpha$ -f)       | 17              | 62            | 2  | 0           | 32          | 28 | $2.86 \times 10^{-2}$ |

3. Efficiency of transformation (Et) with the two cassettes (AD and SUSU) obtained dividing the number of transformants by the total number of transformed cells and by the total amount of DNA used to transform (10  $\mu$ g for AD and 20  $\mu$ g for SUSU). The numbers have been then normalized for the transformability of the cells with the plasmid YCp50 in same growth and cell cycle conditions.

| BIT Cassette | Et San1 asynchronous | Et San1 S phase (HU) | Et San1 G2/M phase (NOC) | Et San1VTΔMAT asynchronous | Et San1VTΔMAT G1 ( $\alpha$ -f) |
|--------------|----------------------|----------------------|--------------------------|----------------------------|---------------------------------|
| AD           | $5 \times 10^{-5}$   | $223 \times 10^{-5}$ | $208 \times 10^{-5}$     | $6.710^{-5}$               | $45 \times 10^{-5}$             |
| SUSU         | $2.3 \times 10^{-5}$ | $14 \times 10^{-5}$  | $1.4 \times 10^{-5}$     | $0.28 \times 10^{-5}$      | $0.44 \times 10^{-5}$           |

**B) SSI**

Distribution of the events after transformation with the SSI cassettes at different phases of the cell cycle. Asynchronous populations of San1 were used as control since San1VTΔMAT did not show any significant difference in SSI with respect to San1 ( $p$  value  $\geq 0.5$ ). Cells were grown up to  $1.4 \times 10^7$ /ml.

1. *adh1* SSI raw data

| Phase             | Transformations | Transformants Analyzed | SSI | <i>up</i> | <i>down</i> | E  | <i>p</i> -value        |
|-------------------|-----------------|------------------------|-----|-----------|-------------|----|------------------------|
| asynchronous San1 | 1               | 40 out of 400          | 40  | 0         | 0           | 0  |                        |
| S phase (HU)      | 1               | 40 out of 828          | 38  | 2         | 0           | 0  | $2.47 \times 10^{-1}$  |
| G2/M (NOC)        | 3               | 40 out of 86           | 9   | 0         | 0           | 31 | $3.82 \times 10^{-14}$ |
| G1 ( $\alpha$ -f) | 1               | 40 out of 60           | 39  | 0         | 0           | 1  | $4.99 \times 10^{-1}$  |

2. *dur3* SSI raw data

| Phase             | Transformations | Transformants Analyzed | SSI | <i>up</i> | <i>down</i> | E  | <i>p</i> -value       |
|-------------------|-----------------|------------------------|-----|-----------|-------------|----|-----------------------|
| asynchronous San1 | 1               | 40 out of 46           | 38  | 0         | 0           | 2  |                       |
| S phase (HU)      | 2               | 40 out of 584          | 40  | 0         | 0           | 0  | $0.25 \times 10^{-1}$ |
| G2/M (NOC)        | 9               | 40 out of 40           | 13  | 2         | 0           | 25 | $2.78 \times 10^{-9}$ |
| G1 ( $\alpha$ -f) | 1               | 40 out of 60           | 18  | 0         | 0           | 22 | $5.9 \times 10^{-7}$  |

3. *ssu1* SSI raw data

| Phase             | Transformations | Transformants Analyzed | SSI | <i>up</i> | <i>down</i> | E  | <i>p</i> -value       |
|-------------------|-----------------|------------------------|-----|-----------|-------------|----|-----------------------|
| asynchronous San1 | 2               | 40 out of 104          | 37  | 1         | 2           | 0  |                       |
| S phase (HU)      | 6               | 40 out of 121          | 38  | 0         | 0           | 2  | $8.68 \times 10^{-2}$ |
| G2/M (NOC)        | 24              | 40 out of 40           | 30  | 0         | 0           | 10 | $1.69 \times 10^{-4}$ |
| G1 ( $\alpha$ -f) | 1               | 40 out of 65           | 39  | 0         | 0           | 1  | $1.78 \times 10^{-1}$ |

4. *suc2* SSI raw data

| Phase             | Transformations | Transformants Analyzed | SSI | <i>up</i> | <i>down</i> | E  | <i>p</i> -value       |
|-------------------|-----------------|------------------------|-----|-----------|-------------|----|-----------------------|
| asynchronous San1 | 2               | 40 out of 238          | 35  | 3         | 2           | 0  |                       |
| S phase (HU)      | 2               | 40 out of 87           | 29  | 7         | 0           | 4  | $9.17 \times 10^{-2}$ |
| G2/M (NOC)        | 12              | 40 out of 60           | 23  | 1         | 1           | 15 | $7.01 \times 10^{-6}$ |
| G1 ( $\alpha$ -f) | 1               | 40 out of 90           | 38  | 0         | 0           | 2  | $1.94 \times 10^{-2}$ |

5. Efficiency (Et) of transformation with the SSI cassettes obtained dividing the number of transformants (above) by the total number of transformed cells and by the total amount of DNA used to transform (10  $\mu$ g). The numbers have been normalized finally for the transformability of the cells with the plasmid YCp50 in same growth and cell cycle conditions. The transformability values in G1 were adjusted considering the transformability of the strain San1VTΔMAT with the plasmid YCp50.

| SSI Cassette | Et asynchronous       | Et S phase (HU)       | Et G2/M phase (NOC)   | Et G1 ( $\alpha$ -f) |
|--------------|-----------------------|-----------------------|-----------------------|----------------------|
| <i>adh1</i>  | $124 \times 10^{-5}$  | $3600 \times 10^{-5}$ | $195 \times 10^{-5}$  | $122 \times 10^{-5}$ |
| <i>dur3</i>  | $14.3 \times 10^{-5}$ | $1270 \times 10^{-5}$ | $30.2 \times 10^{-5}$ | $123 \times 10^{-5}$ |
| <i>ssu1</i>  | $16.1 \times 10^{-5}$ | $88 \times 10^{-5}$   | $10.9 \times 10^{-5}$ | $133 \times 10^{-5}$ |
| <i>suc2</i>  | $37 \times 10^{-5}$   | $189 \times 10^{-5}$  | $13 \times 10^{-5}$   | $185 \times 10^{-5}$ |

C) Comparison between raw transformation data with AD cassette of the wild type strain San1 and of the mutant  $\Delta POL32$  with and without HU. Cells were grown between  $1.2$ – $1.5 \times 10^7$ /ml. Strain  $\Delta POL32$  was also compared with San1 to determine the statistical significance of differences in distribution events within the two strains.

| STRAIN             | Transformations | Transformants | T%   | <i>adh1</i> % | <i>dur3</i> % | E%   | <i>p</i> -value        |
|--------------------|-----------------|---------------|------|---------------|---------------|------|------------------------|
| San1 YPD           | 3               | 51            | 5.9  | 41.2          | 17.6          | 35.3 |                        |
| San1 HU            | 2               | 107           | 15   | 25.2          | 11.2          | 48.6 | $2.23 \times 10^{-2}$  |
| $\Delta POL32$ YPD | 28              | 48            | 18.7 | 12.5          | 4.2           | 64.6 | $4.24 \times 10^{-5}$  |
| $\Delta POL32$ HU  | 3               | 68            | 0    | 100           | 0             | 0    | $1.71 \times 10^{-23}$ |
